# Supplementary material for: Probing interactions through space using spin–spin coupling
Source: Royal Society of Chemistry journal article supplement (doi:10.1039/c4dt00408f), 2014-01-01
Supplement: c4dt00408f1.pdf [file c4dt00408f1.pdf]

## Supporting Information

### Probing interactions through space using spin-spin coupling

Martin W. Stanford, Fergus R. Knight, Kasun S. Athukorala Arachchige, Paula Sanz Camacho, Sharon E. Ashbrook, Michael Bühl, Alexandra M. Z. Slawin, J. Derek Woollins\*.

EaStCHEM, School of Chemistry, University of St Andrews, St Andrews, Fife, KY16 9ST, U.K.; E-mail: jdw3@st-andrews.ac.uk; Fax: (+44) 1334 463384; Tel: (+44)1334 463829.

#### 1. Experimental Section

Additional  $^{13}\text{C}$  NMR and IR spectroscopy data for compounds **2-9**.

**5-(4-fluorophenyltelluro)-6-(phenylselenyl)acenaphthene [Acenap(TeFp)(SePh)] (2):** IR (KBr disk):  $\nu_{\text{max}}$   $\text{cm}^{-1}$  3057w, 2923w, 1872w, 1638w, 1575vs, 1479vs, 1436s, 1408w, 1328s, 1294w, 1249w, 1223vs, 1158s, 1101w, 1069w, 1019w, 841s, 814vs, 737vs, 688s, 666w, 616w, 602w, 572w, 504s, 473w, 413w, 324w;  $^{13}\text{C}$  NMR (75.5 MHz;  $\text{CDCl}_3$ ; 25°C;  $\text{Me}_4\text{Si}$ )  $\delta$  = 163.7(q,  $^1J(\text{C},\text{F}) = 248.6$  Hz), 150.3(q), 146.2(q), 143.5(q,  $^3J(\text{C},\text{F}) = 7.6$  Hz), 141.8(q), 141.6(s), 136.4(q), 136.1(q) 135.9(s), 130.1(s), 129.6(s), 126.9(s), 123.4(q), 121.7(s), 120.9(s), 117.6(d,  $^2J(\text{C},\text{F}) = 20.4$  Hz), 117.0(q, d,  $^4J(\text{C},\text{F}) = 3.8$  Hz), 113.5(q), 30.8 (s,  $\text{CH}_2$ ), 30.1(s,  $\text{CH}_2$ ).

**5-(4-methylphenyltelluro)-6-(phenylselenyl)acenaphthene [Acenap(TeTol)(SePh)] (3):** IR (KBr disk):  $\nu_{\text{max}}$   $\text{cm}^{-1}$  3029w, 2912s, 1872w, 1591w, 1574s, 1475s, 1434s, 1406s, 1328s, 1252w, 1231w, 1209w, 1180w, 1096w, 1058w, 1013s, 839vs, 797vs, 736vs, 689vs, 603w, 572w, 483s, 455s;  $^{13}\text{C}$  NMR (75.5 MHz;  $\text{CDCl}_3$ ; 25 °C;  $\text{Me}_4\text{Si}$ )  $\delta$  = 150.2(q), 146.0(q), 141.7(q), 141.5(s), 141.4(s), 138.9(q), 136.4(q), 136.2(q), 136.0(s), 131.1(s), 130.2(s), 129.6(s), 126.8(s), 123.6(q), 121.7(s), 120.7(s), 118.8(q), 113.6(s), 30.8(s,  $\text{CH}_2$ ), 30.8(s,  $\text{CH}_2$ ), 22.0(s,  $\text{CH}_3$ ).

**5-(4-methoxyphenyltelluro)-6-(phenylselenyl)acenaphthene [Acenap(TeAn-p)(SePh)] (4):** IR (KBr disk):  $\nu_{\text{max}}$   $\text{cm}^{-1}$  3056s, 3002s, 2935s, 2831s, 2528w, 2485w, 2422w, 2370w, 2274w, 2032w, 1936w, 1883s, 1792w, 1739w, 1627w, 1583vs, 1484vs, 1460vs, 1434vs, 1407vs, 1326vs, 1300s, 1282vs, 1243vs, 1176vs, 1100s, 1065s, 1027vs, 930w, 905w, 842vs, 814vs, 788s, 733vs, 684vs, 604s, 588s, 516s, 476s, 454s, 325w;  $^{13}\text{C}$  NMR (75.5 MHz;  $\text{CDCl}_3$ ; 25 °C;  $\text{Me}_4\text{Si}$ )  $\delta$  = 160.6(q), 150.2 (q), 146.0 (q), 143.1(s), 141.8(q), 141.6(s), 136.4(q), 136.2(q), 135.8(s), 130.2(s), 129.6(s), 126.8(s), 123.5(q), 121.7(s), 120.8(s), 116.1(s), 114.0(q), 112.4(q), 55.6(s,  $\text{CH}_3$ ), 30.9(s,  $\text{CH}_2$ ), 30.1 (s,  $\text{CH}_2$ ).

**5-(2-methoxyphenyltelluro)-6-(phenylselenyl)acenaphthene [Acenap(TeAn-o)(SePh)] (5):** IR (KBr disk):  $\nu_{\text{max}}$   $\text{cm}^{-1}$  3045w, 0.22w, 3007w, 2954w, 2919s, 2826w, 2035w, 1888w, 1855w, 1653w, 1591w, 1575vs, 1459vs, 1436vs, 1426s, 1409s, 1329s, 1293s, 1269s, 1243vs, 1174s, 1168s, 1116s, 1101s, 1054s, 1020vs, 999s, 928w, 839s, 812s, 791s, 749vs, 139vs, 714s, 690vs, 669s, 645w, 614w, 602s, 566w, 536w, 493w, 478s, 455w, 440w, 416w;  $^{13}\text{C}$  NMR (75.5 MHz;  $\text{CDCl}_3$ ; 25 °C;  $\text{Me}_4\text{Si}$ )  $\delta$  = 161.4(q), 149.8(q), 146.3(q), 141.9(s), 141.7(q), 140.7(s), 137.4(s), 136.8(q), 129.6(q), 131.1(s), 130.9(s), 129.6(s) 127.0(s), 124.3(q), 122.(s), 121.7(s), 120.7(s), 113.5(q), 112.3(q), 110.6(s), 56.5(s,  $\text{CH}_3$ ), 30.8(s,  $\text{CH}_2$ ), 30.2(s,  $\text{CH}_2$ ).

**5-(4-tertbutylphenyltelluro)-6-(phenylselenyl)acenaphthene [Acenap(TeTp)(SePh)] (6):** IR (KBr disk):  $\nu_{\text{max}}$   $\text{cm}^{-1}$  3450w,

3052w, 2954s, 1657w, 1577s, 1475s, 1437s, 1406s, 1384s, 1332s, 1253s, 1230s, 1110s, 1060s, 843s, 820vs, 737s, 687s, 666s, 605w, 551s, 460w, 277s;  $^{13}\text{C}$  NMR (75.5 MHz;  $\text{CDCl}_3$ ; 25 °C;  $\text{Me}_4\text{Si}$ )  $\delta$  = 152.1(q), 150.2(q), 146.0(q), 141.7(q), 141.5(s), 141.0(s), 138.2(q), 136.4(q), 136.2(s), 130.3(s), 129.6(s), 127.3(s), 126.8(s), 123.7(q), 121.7(s), 120.7(s), 119.0(q), 113.6(q), 35.2(s,  $\text{C}(\text{CH}_3)_3$ ), 31.8(s, 3 x  $\text{CH}_3$ ), 30.8(s,  $\text{CH}_2$ ), 30.1(s,  $\text{CH}_2$ ).

**5-(2,4,6-trimethylphenyltelluro)-6-(phenylselenyl)acenaphthene [Acenap(TeMes)(SePh)] (7):** IR (KBr disk):  $\nu_{\text{max}}$   $\text{cm}^{-1}$  3019w, 2915s, 1657w, 1577s, 1476s, 1436vs, 1375w, 1324s, 1290w, 1250w, 1232w, 1156w, 1099w, 1069w, 1020s, 891w, 842vs, 814s, 728vs, 686s, 603w, 542w, 487w, 455w, 330w;  $^{13}\text{C}$  NMR (75.5 MHz;  $\text{CDCl}_3$ ; 25 °C;  $\text{Me}_4\text{Si}$ )  $\delta$  = 150.2(q), 146.1(q), 145.7(q), 141.8(q), 141.5(s), 139.5(q), 136.6(q), 136.5(q), 134.4(s), 130.4(s), 129.5(s), 127.9(s), 126.7(s), 126.2(q), 123.7(q), 121.9(s), 120.7(s), 30.8(s,  $\text{CH}_2$ ), 30.1(s,  $\text{CH}_2$ ), 29.2(s, 2 x  $\text{CH}_3$ ), 21.6(s,  $\text{CH}_3$ ).

**5-(2,4,6-triisopropylphenyltelluro)-6-(phenylselenyl)acenaphthene [Acenap(TeTip)(SePh)] (8):** IR (KBr disk):  $\nu_{\text{max}}$   $\text{cm}^{-1}$  3057w, 2954vs, 1867w, 1600w, 1589s, 1577vs, 1553s, 1476vs, 1456s, 1436s, 1407s, 1378s, 1359s, 1328s, 1309s, 1293w, 1251s, 1233s, 1176w, 1162w, 1149w, 1113w, 1100s, 1068s, 1020s, 998s, 933s, 876s, 838vs, 813s, 747s, 731vs, 689s, 667s, 647w, 618w, 605w, 489w, 455.7s;  $^{13}\text{C}$  NMR (75.5 MHz;  $\text{CDCl}_3$ ; 25 °C;  $\text{Me}_4\text{Si}$ )  $\delta$  = 155.7(q), 150.9(q), 150.3(q), 145.7(q), 141.9(q), 141.5(s), 136.7(q), 136.3(q), 135.8(s), 130.5(s), 129.5(s), 127.7(q), 126.7(s), 123.7(q), 121.9(s), 121.7(s), 120.7(s), 114.9(q), 39.8(s, 2 x  $\text{CHMe}_2$ ), 34.7(s, 1 x  $\text{CHMe}_2$ ), 30.83(s,  $\text{CH}_2$ ), 30.1(s,  $\text{CH}_2$ ), 25.3(s, 4 x  $\text{CH}_3$ ), 24.5(s, 2 x  $\text{CH}_3$ ).

**5-(naphthyltelluro)-6-(phenylselenyl)acenaphthene [Acenap(TeNap)(SePh)] (9):** IR (KBr disk):  $\nu_{\text{max}}$   $\text{cm}^{-1}$  3051s, 2914w, 2824w, 1939w, 1868w, 1599w, 1574s, 1552w, 1494w, 1475s, 1435s, 1407s, 1324s, 1251s, 1230w, 1193w, 1098s, 1064w, 1018s, 946w, 909w, 839s, 791s, 768s, 731s, 686s, 665w, 602w, 524w, 455w, 408w;  $^{13}\text{C}$  NMR (75.5 MHz;  $\text{CDCl}_3$ ; 25°C;  $\text{Me}_4\text{Si}$ )  $\delta$  = 150.4(q), 146.0(q), 142.0(s), 141.8(q), 141.6(s), 138.7(q), 137.0(q), 136.3(s), 134.0(q), 133.8(s), 132.7(q), 130.9(s), 130.2(s), 129.6(s), 129.2(s), 127.5(s), 127.2(s), 126.9(s), 126.7(s), 125.8(q), 123.5(q), 121.8(s), 120.8(s), 113.0(q), 30.8(s,  $\text{CH}_2$ ), 30.0(s,  $\text{CH}_2$ ).

## 2. Solid-State NMR Experimental Details

**Table S1.** Experimental details, the number of coadded transients, recycle intervals and cross-polarisation contact times (where appropriate) used for recording the  $^{77}\text{Se}$  solid-state NMR spectra.

| Sample   | Experiment | Magnetic field (T) | Number of transients | Recycle interval / s | Contact time / ms |
|----------|------------|--------------------|----------------------|----------------------|-------------------|
| <b>6</b> | CP MAS     | 9.4                | 17248                | 3                    | 8                 |
| <b>8</b> | CP MAS     | 9.4                | 1656                 | 3                    | 8                 |

**Table S2.** Experimental details, the number of coadded transients, recycle intervals and cross-polarisation contact times (where appropriate) used for recording the  $^{125}\text{Te}$  solid-state NMR spectra.

| Sample   | Experiment | Magnetic field (T) | Number of transients | Recycle interval / s | Contact time / ms |
|----------|------------|--------------------|----------------------|----------------------|-------------------|
| <b>6</b> | CP MAS     | 9.4                | 54264                | 3                    | 8                 |
| <b>8</b> | CP MAS     | 9.4                | 46560                | 3                    | 8                 |

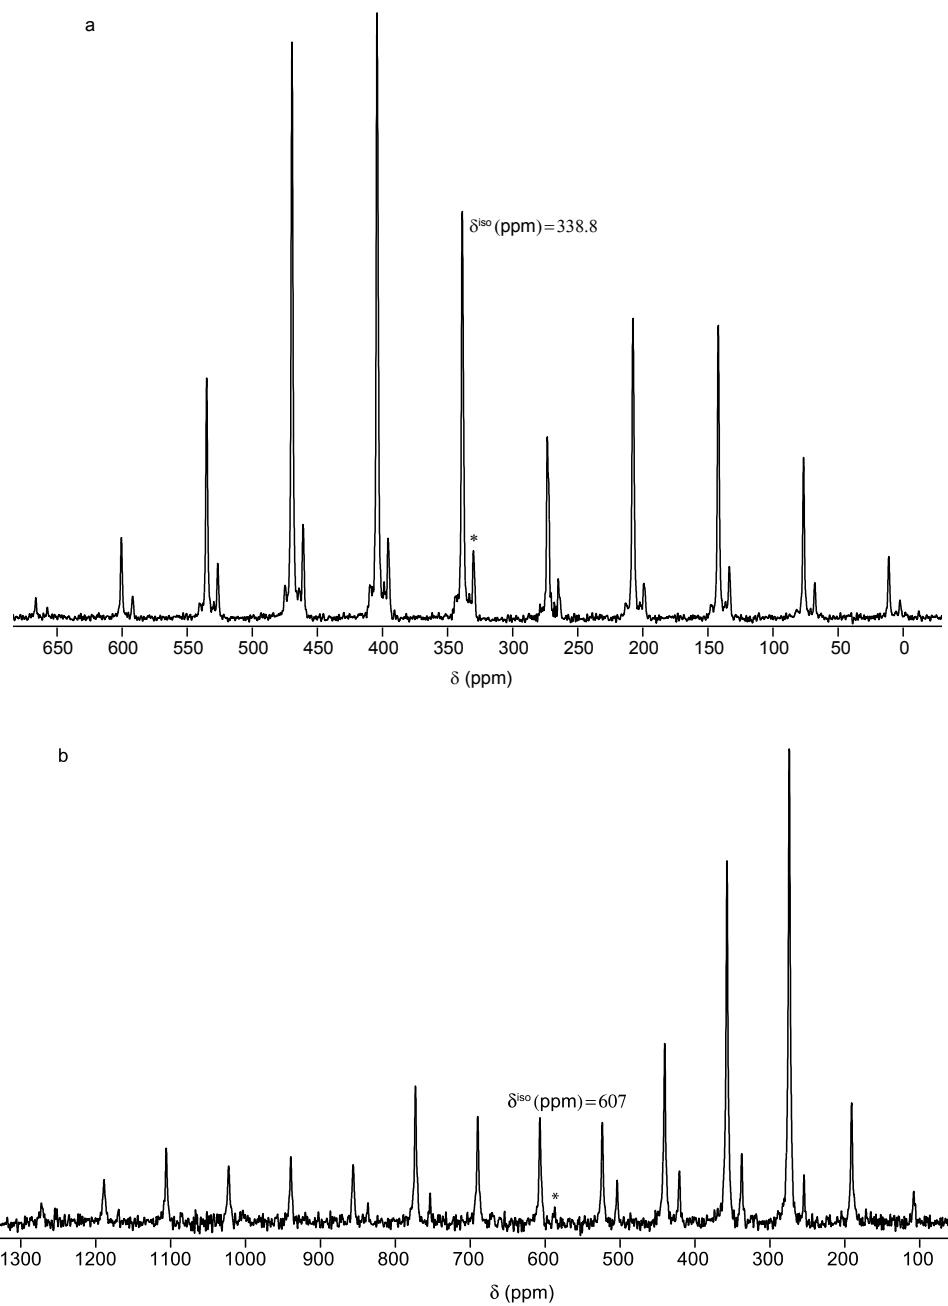

**Figure S1.**  $^{77}\text{Se}$  (a) and  $^{125}\text{Te}$  (b) solid-state NMR spectra of compound **6**, recorded using MAS rates of 5 kHz and 10.5 kHz, respectively. The values quoted correspond to the isotropic chemical shift. The presence of an as yet unidentified impurity is observed in both spectra (indicated by \*).

### 3. Crystal structure analyses

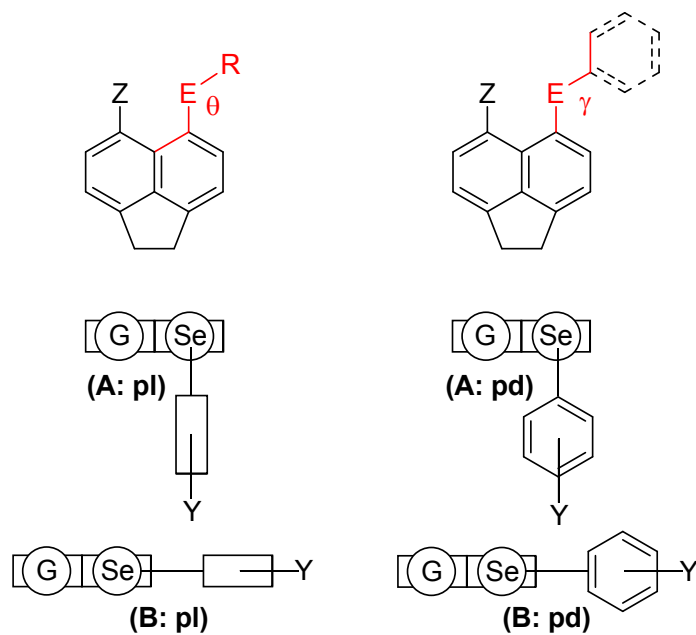

**Figure S2.** The absolute conformation of aromatic rings is calculated from torsion angles  $\theta$  (defining rotation around the E- $C_{\text{Acenap}}$  bond) and  $\gamma$  (defining rotation around the E- $C_{\text{Ar}}$  bond) and classified by types A (axial, perpendicular), B (equatorial, planar) or C (twist) and **pd** (perpendicular), **pl** (planar) or **np** (not planar or perpendicular).<sup>1,2</sup>

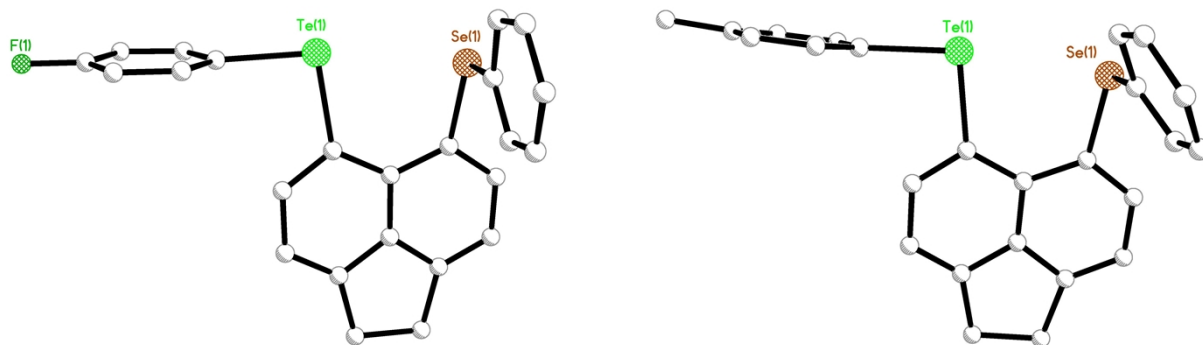

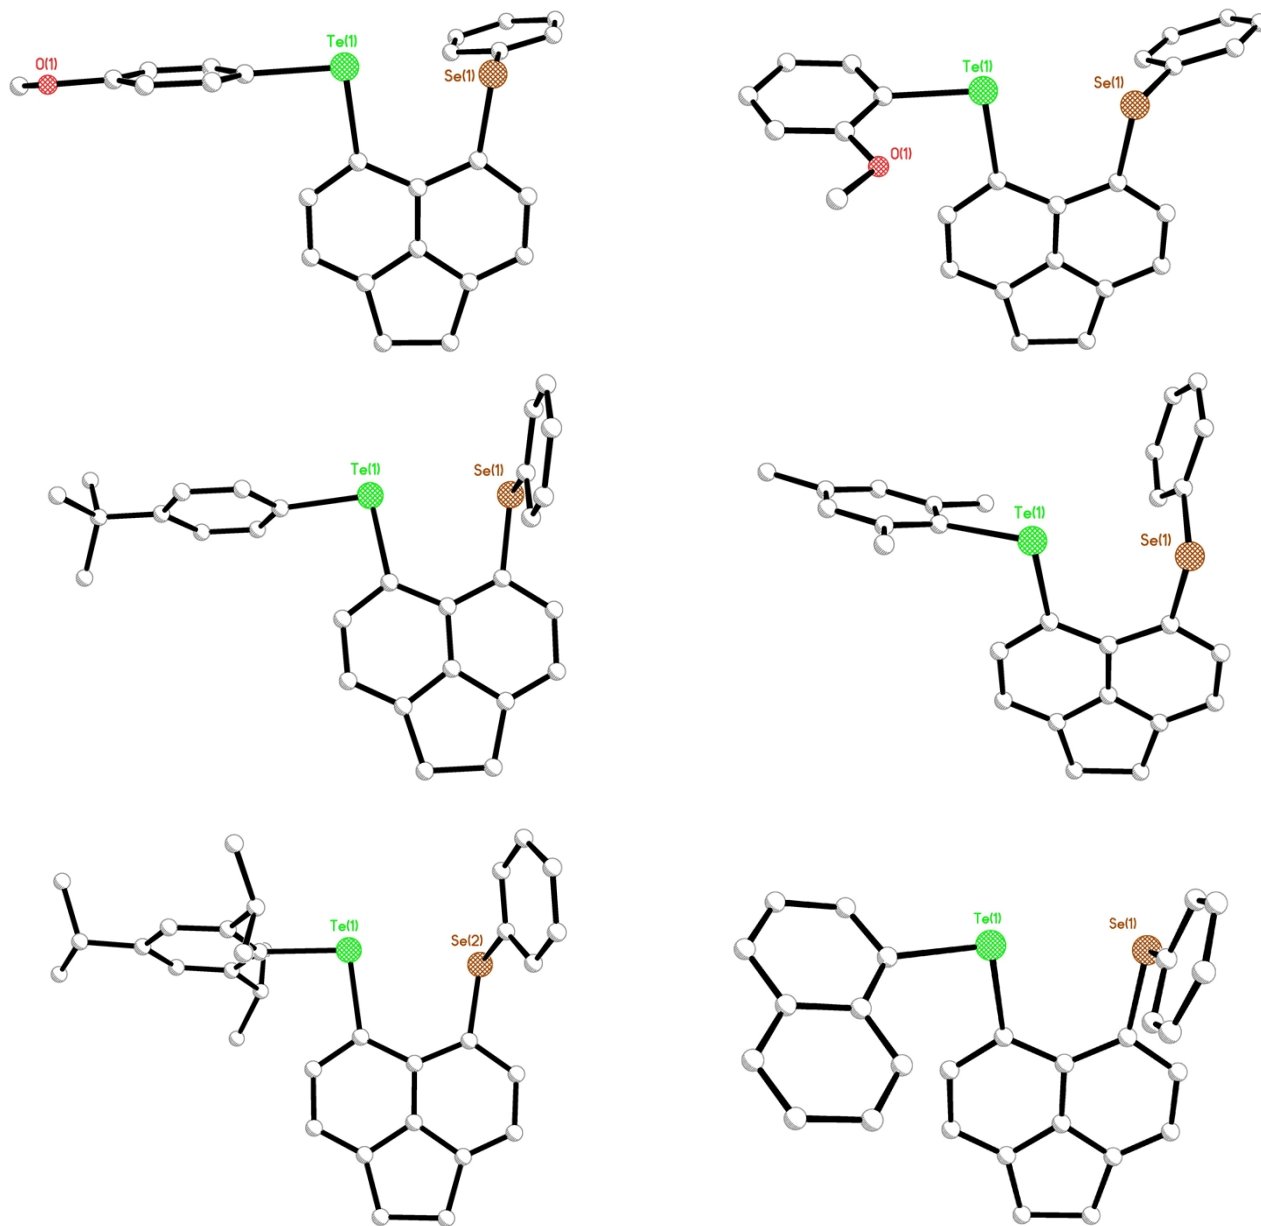

**Figure S3.** Molecular structures of compounds 2-9.

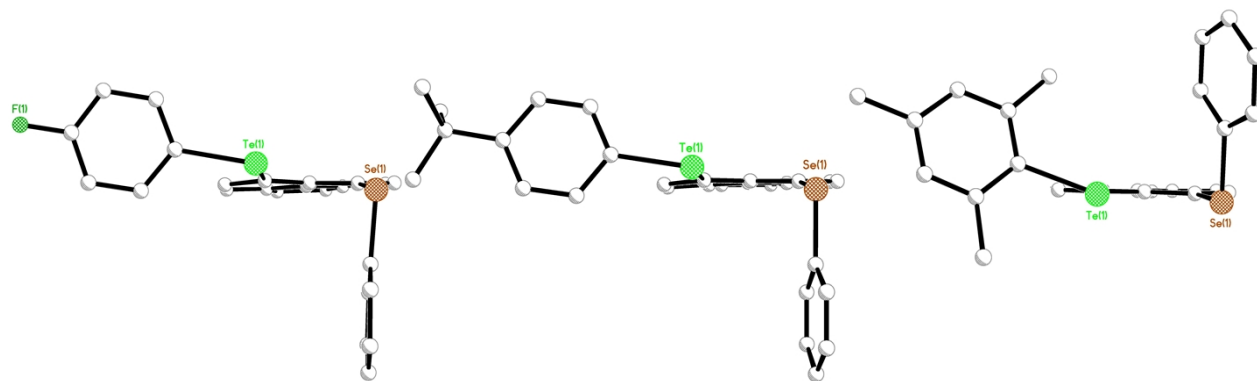

**Figure S4.** Compounds **2** Te(Fp), **6** Te(Tp) and **7** Te(Mes) adopt similar (**B:pd**; **A:pl**) type conformations to **8** Te(Tip).

**Table S3.** Crystallographic data for compounds **2-4**.

|                                              | <b>2</b>                              | <b>3</b>                             | <b>4</b>                              |
|----------------------------------------------|---------------------------------------|--------------------------------------|---------------------------------------|
| Empirical Formula                            | C <sub>24</sub> H <sub>17</sub> FSeTe | C <sub>25</sub> H <sub>20</sub> SeTe | C <sub>25</sub> H <sub>20</sub> OSeTe |
| Formula Weight                               | 530.96                                | 526.99                               | 542.99                                |
| Temperature (°C)                             | -148(1)                               | -100                                 | -148(1)                               |
| Crystal Colour, Habit                        | colorless, block                      | colorless, prism                     | colorless, chunk                      |
| Crystal Dimensions (mm <sup>3</sup> )        | 0.120 X 0.090 X 0.060                 | 0.120 X 0.090 X 0.020                | 0.150 X 0.120 X 0.030                 |
| Crystal System                               | monoclinic                            | triclinic                            | monoclinic                            |
| Lattice Parameters                           | a = 9.8746(9) Å                       | a = 10.854(2) Å                      | a = 8.212(5) Å                        |
|                                              | b = 22.045(2) Å                       | b = 12.244(2) Å                      | b = 11.442(2) Å                       |
|                                              | c = 9.7763(8) Å                       | c = 17.599(2) Å                      | c = 22.113(3) Å                       |
|                                              | -                                     | α = 106.370(8)°                      | -                                     |
|                                              | β = 116.385(8)°                       | β = 92.585(7)°                       | β = 99.96(4)°                         |
|                                              | -                                     | γ = 114.888(8)°                      | -                                     |
| Volume (Å <sup>3</sup> )                     | 1906.4(4)                             | 1999.4(5)                            | 2046(2)                               |
| Space Group                                  | P2 <sub>1</sub> /c                    | P-1                                  | P2 <sub>1</sub> /n                    |
| Z Value                                      | 4                                     | 4                                    | 4                                     |
| Dcalc (g/cm <sup>3</sup> )                   | 1.850                                 | 1.751                                | 1.762                                 |
| F000                                         | 1024                                  | 1024                                 | 1056                                  |
| μ(MoKα) (cm <sup>-1</sup> )                  | 34.852                                | 33.155                               | 32.457                                |
| No. of Reflections Measured                  | 14559                                 | 11859                                | 15073                                 |
| Rint                                         | 0.0296                                | 0.0309                               | 0.0961                                |
| Min and Max Transmissions                    | 0.670 - 0.811                         | 0.530 - 0.936                        | 0.486 - 0.907                         |
| Independ. Reflection (No. Variables)         | 3359(244)                             | 6653(489)                            | 3606(253)                             |
| Reflection/Parameter Ratio                   | 13.77                                 | 13.61                                | 14.25                                 |
| Residuals: R1 (I>2.00σ(I))                   | 0.0178                                | 0.0343                               | 0.0667                                |
| Residuals: R (All Reflections)               | 0.0216                                | 0.0525                               | 0.1079                                |
| Residuals: wR <sub>2</sub> (All Reflections) | 0.0652                                | 0.0597                               | 0.1918                                |
| Goodness of Fit Indicator                    | 1.261                                 | 1.033                                | 1.065                                 |
| Maximum peak in Final Diff. Map              | 0.51 e <sup>-</sup> /Å <sup>3</sup>   | 0.46 e <sup>-</sup> /Å <sup>3</sup>  | 1.00 e <sup>-</sup> /Å <sup>3</sup>   |
| Minimum peak in Final Diff. Map              | -0.53 e <sup>-</sup> /Å <sup>3</sup>  | -0.55 e <sup>-</sup> /Å <sup>3</sup> | -2.12 e <sup>-</sup> /Å <sup>3</sup>  |

**Table S4.** Crystallographic data for compounds **5-7**.

|                                       | <b>5</b>                              | <b>6</b>                             | <b>7</b>                             |
|---------------------------------------|---------------------------------------|--------------------------------------|--------------------------------------|
| Empirical Formula                     | C <sub>25</sub> H <sub>20</sub> OSeTe | C <sub>28</sub> H <sub>26</sub> SeTe | C <sub>27</sub> H <sub>24</sub> SeTe |
| Formula Weight                        | 542.99                                | 569.07                               | 555.05                               |
| Temperature (°C)                      | -148(1)                               | -148                                 | -100                                 |
| Crystal Colour, Habit                 | colorless, chunk                      | colorless, chunk                     | colorless, block                     |
| Crystal Dimensions (mm <sup>3</sup> ) | 0.120 X 0.090 X 0.030                 | 0.120 X 0.090 X 0.060                | 0.120 X 0.060 X 0.050                |
| Crystal System                        | triclinic                             | triclinic                            | monoclinic                           |
| Lattice Parameters                    | a = 8.645(4) Å                        | a = 9.656(1) Å                       | a = 9.7619(7) Å                      |
|                                       | b = 14.625(7) Å                       | b = 10.492(2) Å                      | b = 30.047(2) Å                      |
|                                       | c = 17.253(9) Å                       | c = 12.795(2) Å                      | c = 8.084(2) Å                       |
|                                       | α = 109.466(12)°                      | α = 79.476(6)°                       | -                                    |

|                                             |                                       |                                       |                                       |
|---------------------------------------------|---------------------------------------|---------------------------------------|---------------------------------------|
|                                             | $\beta = 97.975(10)^\circ$            | $\beta = 73.922(6)^\circ$             | $\beta = 113.571(8)^\circ$            |
|                                             | $\gamma = 93.276(6)^\circ$            | $\gamma = 70.177(5)^\circ$            | -                                     |
| Volume ( $\text{\AA}^3$ )                   | 2024(2)                               | 1166.2(3)                             | 2173.2(5)                             |
| Space Group                                 | P-1                                   | P-1                                   | P2 <sub>1</sub> /c                    |
| Z Value                                     | 4                                     | 2                                     | 4                                     |
| Dcalc (g/cm <sup>3</sup> )                  | 1.782                                 | 1.621                                 | 1.696                                 |
| F000                                        | 1056                                  | 560                                   | 1088                                  |
| $\mu(\text{MoK}\alpha)$ (cm <sup>-1</sup> ) | 32.812                                | 28.488                                | 30.550                                |
| No. of Reflections Measured                 | 15382                                 | 8975                                  | 14054                                 |
| Rint                                        | 0.0524                                | 0.0232                                | 0.0238                                |
| Min and Max Transmissions                   | 0.607 - 0.906                         | 0.703 - 0.843                         | 0.685 - 0.858                         |
| Independ. Reflection (No. Variables)        | 7076(505)                             | 4100(271)                             | 3762(265)                             |
| Reflection/Parameter Ratio                  | 14.01                                 | 15.13                                 | 14.20                                 |
| Residuals: R1 (I>2.00 $\sigma$ (I))         | 0.0655                                | 0.0234                                | 0.0213                                |
| Residuals: R (All Reflections)              | 0.0884                                | 0.0298                                | 0.0258                                |
| Residuals: $wR_2$ (All Reflections)         | 0.2857                                | 0.0737                                | 0.0567                                |
| Goodness of Fit Indicator                   | 1.226                                 | 1.168                                 | 1.149                                 |
| Maximum peak in Final Diff. Map             | 2.42 e <sup>-</sup> / $\text{\AA}^3$  | 0.42 e <sup>-</sup> / $\text{\AA}^3$  | 0.35 e <sup>-</sup> / $\text{\AA}^3$  |
| Minimum peak in Final Diff. Map             | -2.33 e <sup>-</sup> / $\text{\AA}^3$ | -0.43 e <sup>-</sup> / $\text{\AA}^3$ | -0.36 e <sup>-</sup> / $\text{\AA}^3$ |

**Table S5.** Crystallographic data for compounds **8** and **9**.

|                                       | <b>8</b>                             | <b>9</b>                             |
|---------------------------------------|--------------------------------------|--------------------------------------|
| Empirical Formula                     | C <sub>33</sub> H <sub>36</sub> SeTe | C <sub>28</sub> H <sub>20</sub> SeTe |
| Formula Weight                        | 639.21                               | 563.03                               |
| Temperature (°C)                      | -148                                 | -148(1)                              |
| Crystal Colour, Habit                 | colorless, chunk                     | colorless, chunk                     |
| Crystal Dimensions (mm <sup>3</sup> ) | 0.120 X 0.090 X 0.030                | 0.150 X 0.060 X 0.030                |
| Crystal System                        | monoclinic                           | monoclinic                           |
| Lattice Parameters                    | a = 14.697(2) $\text{\AA}$           | a = 29.375(3) $\text{\AA}$           |
|                                       | b = 14.367(2) $\text{\AA}$           | b = 7.6824(8) $\text{\AA}$           |
|                                       | c = 14.835(2) $\text{\AA}$           | c = 19.044(2) $\text{\AA}$           |
|                                       | -                                    | -                                    |

|                                              |                                       |                                       |
|----------------------------------------------|---------------------------------------|---------------------------------------|
|                                              | $\beta = 119.048(9)^\circ$            | $\beta = 95.737(7)^\circ$             |
|                                              | -                                     | -                                     |
| Volume ( $\text{\AA}^3$ )                    | 2738.6(5)                             | 4276.1(8)                             |
| Space Group                                  | P2 <sub>1</sub> /n                    | C2/c                                  |
| Z Value                                      | 4                                     | 8                                     |
| Dcalc (g/cm <sup>3</sup> )                   | 1.550                                 | 1.749                                 |
| F000                                         | 1280                                  | 2192                                  |
| $\mu(\text{MoK}\alpha)$ (cm <sup>-1</sup> )  | 24.355                                | 31.070                                |
| No. of Reflections Measured                  | 20535                                 | 15814                                 |
| Rint                                         | 0.0414                                | 0.0351                                |
| Min and Max Transmissions                    | 0.748 - 0.930                         | 0.727 - 0.911                         |
| Independ. Reflection (No. Variables)         | 4827(316)                             | 3763(271)                             |
| Reflection/Parameter Ratio                   | 15.28                                 | 13.89                                 |
| Residuals: R1 (I>2.00 $\sigma$ (I))          | 0.0284                                | 0.0248                                |
| Residuals: R (All Reflections)               | 0.0382                                | 0.0303                                |
| Residuals: wR <sub>2</sub> (All Reflections) | 0.1078                                | 0.0539                                |
| Goodness of Fit Indicator                    | 1.288                                 | 1.097                                 |
| Maximum peak in Final Diff. Map              | 0.75 e <sup>-</sup> / $\text{\AA}^3$  | 0.74 e <sup>-</sup> / $\text{\AA}^3$  |
| Minimum peak in Final Diff. Map              | -0.88 e <sup>-</sup> / $\text{\AA}^3$ | -0.39 e <sup>-</sup> / $\text{\AA}^3$ |

#### 4. Computational Analyses

Starting from the coordinates from X-ray crystallography, geometries were fully optimized in the gas phase at the B3LYP level<sup>3</sup> using the Stuttgart-Dresden (SDD) effective core potential along with its double zeta valence basis sets for Te<sup>4</sup> (augmented with a set of d-polarization functions with exponent 0.237),<sup>5</sup> Curtis and Binning's 962(d) basis<sup>6</sup> on Se and 6-31G(d) basis elsewhere. Wiberg bond indices<sup>7</sup> were obtained in a natural bond orbital analysis<sup>8</sup> at the same level. This or similar levels have been useful for interpreting experimental findings for *peri*-naphthalene telluride derivatives.<sup>9</sup> Compound **1** was reoptimised using the PBE0 hybrid functional.<sup>10</sup> A fine integration grid (75 radial shells with 302 angular points per shell) was used throughout. These computations were performed using the Gaussian 09 program.<sup>11</sup>

Indirect spin-spin coupling constants (SSCCs) were computed<sup>12</sup> at the BP86<sup>13</sup> level for the B3LYP minima (for **1**, also at the PBE0<sup>10</sup> level using the PBE0 structure<sup>14</sup>) with the relativistic zeroth-order regular approximation including spin-orbit coupling (ZORA-SO),<sup>15,16</sup> together with a TZ2P basis of Slater-type orbitals and a fine integration grid (Integration 6). These calculations were performed with the ADF program.<sup>17,18</sup>

#### 5. References

<sup>1</sup> P. Nagy, D. Szabó, I. Kapovits, Á. Kucsman, G. Argay, A. Kálmán, *J. Mol. Struct.* 2002, **606**, 61.

<sup>2</sup> W. Nakanishi, S. Hayashi, S. Toyota, *Chem. Commun.* 1996, 371; W. Nakanishi, S. Hayashi, A. Sakaue, G. Ono, Y. Kawada, *J. Am. Chem. Soc.* 1998, **120**, 3635; W. Nakanishi, S. Hayashi, S. Toyota, *J. Org. Chem.* 1998, **63**, 8790; S. Hayashi, W. Nakanishi, *J. Org. Chem.* 1999, **64**, 6688; W. Nakanishi, S. Hayashi, T. Uehara, *J. Phys. Chem.* 1999, **103**, 9906; W. Nakanishi, S. Hayashi, *Phosphorus, Sulfur, Silicon Relat. Elem.* 2002, **177**, 1833; S. Hayashi, W. Nakanishi, *J.*



- 
- Org. Chem.* 2002, **67**, 38; S. Hayashi, W. Nakanishi, *Bull. Chem. Soc. Jpn.* 2008, **81**, 1605; S. Hayashi, K. Yamane, W. Nakanishi, *Bioinorganic Chemistry and Applications* 2009, 2009, doi:10.1155/2009/347359; T. Nakai, M. Nishino, S. Hayashi, M. Hashimoto, W. Nakanishi, *Dalton Trans.* 2012, **41**, 7485.
- <sup>3</sup> A. D. Becke, *J. Chem. Phys.*, 1993, **98**, 5648-5652; C. Lee, W. Yang, R. G. Parr, *Phys. Rev. B*, 1988, **37**, 785-789.
- <sup>4</sup> P. Schwerdtfeger, M. Dolg, W. H. E. Schwarz, G. A. Bowmaker, P. D. W. Boyd, *J. Chem. Phys.*, 1989, **91**, 1762-1774; A. Bergner, M. Dolg, W. Kuechle, H. Stoll, H. Preuss, *Mol. Phys.*, 1993, **80**, 1431-1441.
- <sup>5</sup> S. Huzinaga, J. Anzelm, M. Klobukowski, E. Radzio-Andzelm, Y. Sakai, H. Tatewaki, in: *Gaussian Basis Sets for Molecular Calculations*, Elsevier, Amsterdam, 1984.
- <sup>6</sup> R. C. Binning, L. A. Curtiss, *J. Comput. Chem.*, 1990, **11**, 1206.
- <sup>7</sup> K. B. Wiberg, *Tetrahedron*, 1968, **24**, 1083-1096.
- <sup>8</sup> A. E. Reed, F. Curtiss, L. A. F. Weinhold, *Chem. Rev.*, 1988, **88**, 899-926.
- <sup>9</sup> F. R. Knight, A. L. Fuller, M. Bühl, A. M. Z. Slawin, J. D. Woollins, *Chem. Eur. J.* 2010, **16**, 7605-7616; F. R. Knight, A. L. Fuller, M. Bühl, A. M. Z. Slawin, J. D. Woollins, *Inorg. Chem.* 2010, **49**, 7577-7596; F. R. Knight, K. S. A. Arachchige, R. A. M. Randall, M. Bühl, A. M. Z. Slawin, J. D. Woollins, *Dalton Trans.* 2012, **41**, 3154-3165.
- <sup>10</sup> J. P. Perdew, K. Burke, M. Ernzerhof, *Phys. Rev. Lett.* 1996, **77**, 3865; J. P. Perdew, K. Burke, M. Ernzerhof, *Phys. Rev. Lett.* 1997, **78**, 1396; C. Adamo, V. Barone, *J. Chem. Phys.* 1999, **110**, 6158.
- <sup>11</sup> M. J. Frisch, G. W. Trucks, H. B. Schlegel, G. E. Scuseria, M. A. Robb, J. R. Cheeseman, G. Scalmani, V. Barone, B. Mennucci, G. A. Petersson, H. Nakatsuji, M. Caricato, X. Li, H. P. Hratchian, A. F. Izmaylov, J. Bloino, G. Zheng, J. L. Sonnenberg, M. Hada, M. Ehara, K. Toyota, R. Fukuda, J. Hasegawa, M. Ishida, T. Nakajima, Y. Honda, O. Kitao, H. Nakai, T. Vreven, J. A. Montgomery, Jr., J. E. Peralta, F. Ogliaro, M. Bearpark, J. J. Heyd, E. Brothers, K. N. Kudin, V. N. Staroverov, R. Kobayashi, J. Normand, K. Raghavachari, A. Rendell, J. C. Burant, S. S. Iyengar, J. Tomasi, M. Cossi, N. Rega, J. M. Millam, M. Klene, J. E. Knox, J. B. Cross, V. Bakken, C. Adamo, J. Jaramillo, R. Gomperts, R. E. Stratmann, O. Yazyev, A. J. Austin, R. Cammi, C. Pomelli, J. W. Ochterski, R. L. Martin, K. Morokuma, V. G. Zakrzewski, G. A. Voth, P. Salvador, J. J. Dannenberg, S. Dapprich, A. D. Daniels, O. Farkas, J. B. Foresman, J. V. Ortiz, J. Cioslowski, and D. J. Fox, Gaussian 09, Revision A.02, Gaussian, Inc., Wallingford CT, 2009.
- <sup>12</sup> J. Autschbach, T. Ziegler, *J. Chem. Phys.* **2000**, *113*, 936; J. Autschbach, *J. Chem. Phys.* **2008**, *129*, 094105.
- <sup>13</sup> A. D. Becke, *Phys. Rev. A* **1988**, *38*, 3098-3100; J. P. Perdew, *Phys. Rev. B* **1986**, *33*, 8822; J. P. Perdew, *Phys. Rev. B* **1986**, *34*, 7406.
- The effect of the functional used in the geometry optimisation is quite small for **1**, where the ZORA-SO/BP86 couplings are very similar for the B3LYP and PBE0 optimised structures, within 5 Hz.
- <sup>15</sup> E. van Lenthe, E. J. Baerends, J. G. Snijders, *J. Chem. Phys.* **1994**, *101*, 9783; E. van Lenthe, R. van Leeuwen, E. J. Baerends, J. G. Snijders, *Int. J. Quantum Chem.* **1996**, *57*, 281-293; E. van Lenthe, E. J. Baerends, J. G. Snijders, *J. Chem. Phys.* **1993**, *99*, 4597.
- <sup>16</sup> E. van Lenthe, J. G. Snijders, E. J. Baerends, *J. Chem. Phys.* **1996**, *105*, 6505.
- <sup>17</sup> E. J. Baerends, D. E. Ellis, P. Ros, *Chem. Phys.* **1973**, *2*, 41; G. te Velde, E. J. Baerends, *J. Comput. Phys.* **1992**, *99*, 84; G. te Velde, F. M. Bickelhaupt, E. J. Baerends, C. Fonseca Guerra, S. J. A. van Gisbergen, J. G. Snijders, T. Ziegler, *J. Comput. Chem.* **2001**, *22*, 931.
- <sup>18</sup> E. J. Baerends, T. Ziegler, J. Autschbach, D. Bashford, A. Bérces, F. M. Bickelhaupt, C. Bo, P. M. Boerrigter, L. Cavallo,

---

D.P. Chong, L. Deng, R.M. Dickson, D.E. Ellis, M. van Faassen, L. Fan, T.H. Fischer, C. Fonseca Guerra, A. Ghysels, A. Giammona, S.J.A. van Gisbergen, A.W. Götz, J.A. Groeneveld, O.V. Gritsenko, M. Grüning, S. Gusarov, F.E. Harris, P. van den Hoek, C.R. Jacob, H. Jacobsen, L. Jensen, J.W. Kaminski, G. van Kessel, F. Kootstra, A. Kovalenko, M.V. Krykunov, E. van Lenthe, D.A. McCormack, A. Michalak, M. Mitoraj, J. Neugebauer, V.P. Nicu, L. Noodleman, V.P. Osinga, S. Patchkovskii, P.H.T. Philipsen, D. Post, C.C. Pye, W. Ravenek, J.I. Rodríguez, P. Ros, P.R.T. Schipper, G. Schreckenbach, J.S. Seldenthuis, M. Seth, J.G. Snijders, M. Solà, M. Swart, D. Swerhone, G. te Velde, P. Vernooijs, L. Versluis, L. Visscher, O. Visser, F. Wang, T.A. Wesolowski, E.M. van Wezenbeek, G. Wiesenekker, S.K. Wolff, T.K. Woo, A.L. Yakovlev, ADF2010.02, SCM, Theoretical Chemistry, Vrije Universiteit, Amsterdam, The Netherlands, <http://www.scm.com> (accessed May 2012).
